# Supplementary material for: High-fidelity DNA replication in Mycobacterium tuberculosis relies on a trinuclear zinc center
Source: PubMed Central journal article supplement (PMC5636811; doi:10.1038/s41467-017-00886-w), 2017-10-11

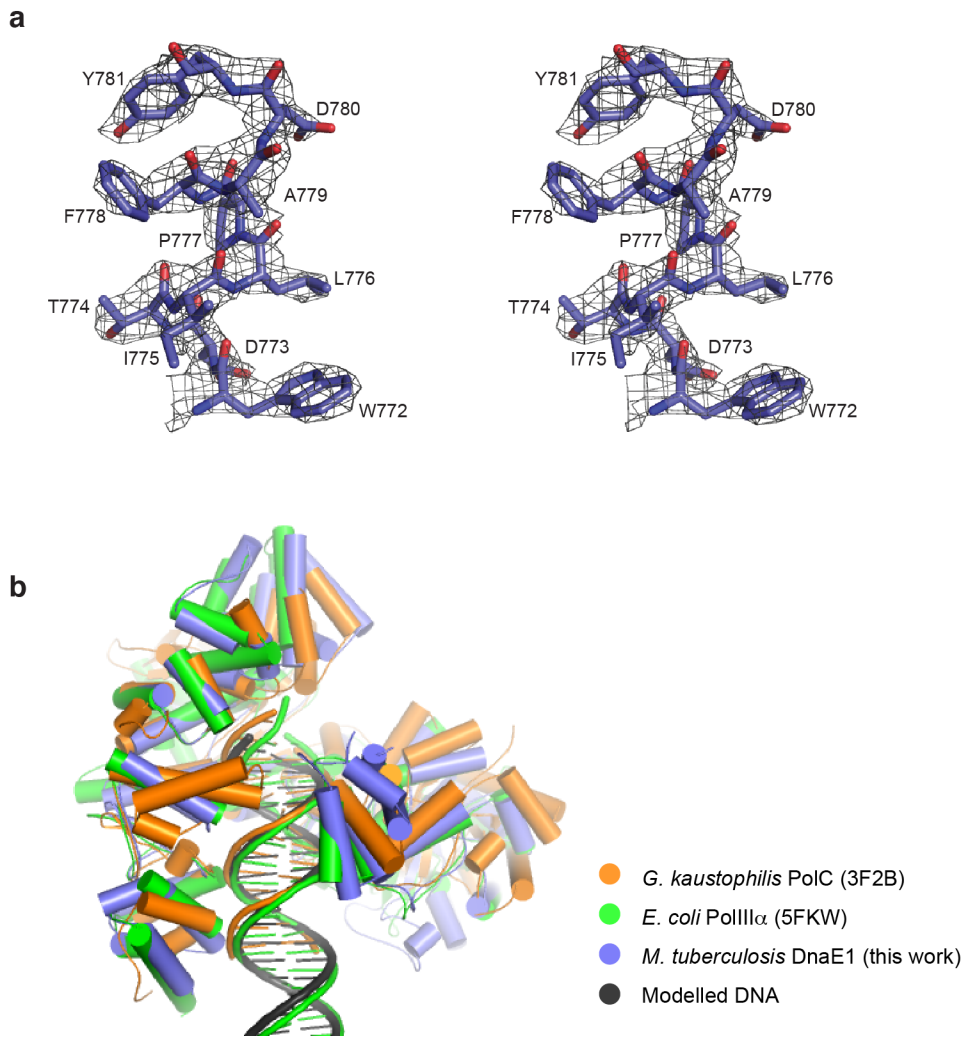

**Supplementary Figure 1 | Stereo view of electron density and modeling of a DNA substrate into the crystal structure of Mtb DnaE1.**

(a) Stereo view of a 2mFo-DFc electron density map contoured at  $2.1\sigma$  (b) Modeling of DNA binding. The *Geobacillus kaustophilis* PolC-DNA complex<sup>1</sup> and *E. coli* PolIII $\alpha$ -DNA complex<sup>2</sup> were superimposed onto the structure of Mtb DnaE1 using the palm and fingers domain (residues 307-933) as a guide. Next, a B-form dsDNA model was manually aligned with the DNA from PolC and PolIII $\alpha$ .

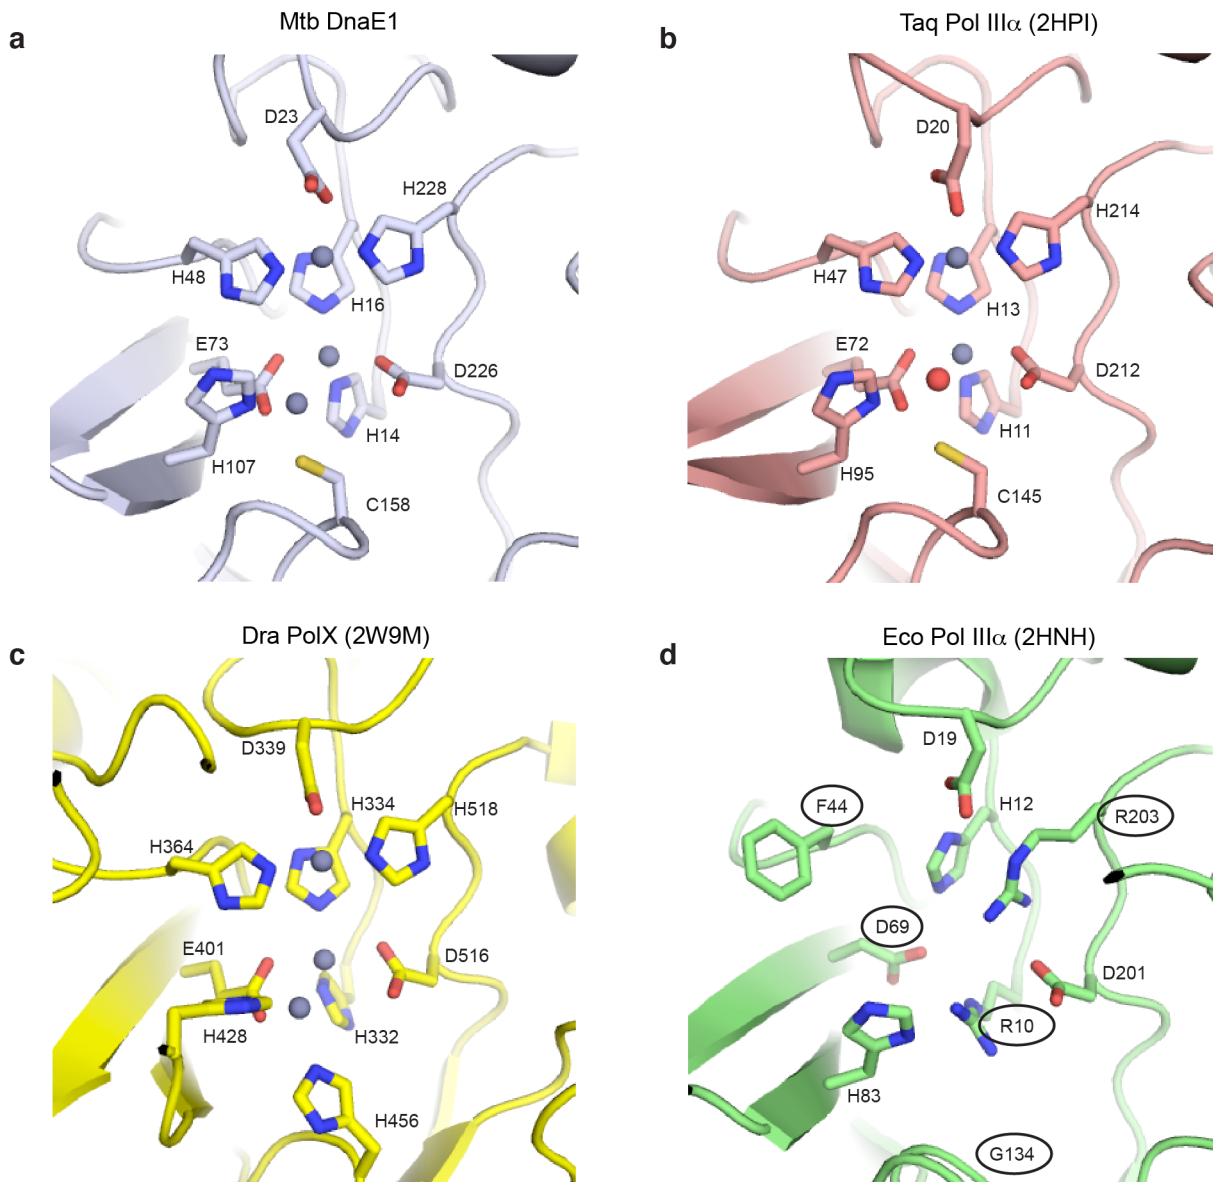

**Supplementary Figure 2 | Conserved features of the PHP-exonuclease active site.** (a) PHP active site of Mtb DnaE1. The metal binding residues shown in stick, and Zn ions in grey spheres (b) PHP active site of Taq PolIII $\alpha$ <sup>3</sup>. Note that one of the metal ions is modeled as a water molecule (shown in red sphere). (c) PHP active site from *Deinococcus radiodurans* PolX<sup>4</sup> (d) PHP active site from *E. coli* PolIII $\alpha$ <sup>5</sup>. The five residues that deviate from the consensus sequences are indicated with circles. Note that no metals are bound in the active site.

**a**

*Mycobacterium tuberculosis* H37Rv/73-142  
*Mycobacterium smegmatis* str. MC2\_155/75-144  
*Mycobacterium leprae* TN/69-103  
*Rhodococcus pyridinivorans* SB3094/68-102  
*Amycolicococcus subflavus* DQ83-9a1/82-116  
*Gordonia bronchialis* DSM 43247/68-102  
*Corynebacterium diptheriae* HC02/70-104  
*Corynebacterium maris* DSM 45190/70-104  
*Corynebacterium resistens* DSM 45100/69-103  
*Corynebacterium kroppenstedtii* DSM 44385/76-110  
*Corynebacterium terpenotabidum* Y-11/69-103  
*Segniliparus rotundus* DSM 44985/68-102  
*Frankia alni* ACN14a/68-102  
*Thermomonospora curvata* DSM 43183/68-102  
*Streptosporangium roseum* DSM 43021/68-102  
*Catenulispora acidiphila* DSM 44928/68-102  
*Kitasatospora setae* KM-6054/769-103  
*Actinosynnema mirum* DSM 43827/68-102  
*Saccharopolyspora erythraea* NRRL 2338/69-107  
*Saccharomonospora viridis* DSM 43017/69-107  
*Frankia* sp. Cc13/69-146  
*Nocardioopsis dassonvillei* subsp. *dassonvillei* DS  
*Streptomyces coelicolor* A3  
*Kitasatospora setae* KM-6054/68-107  
*Propionibacterium avidum* 44067/73-110  
*Acidothermus cellulolyticus* 11B/88-120  
*Pseudonocardia dioxanivorans* CB1190/72-104  
*Arthrobacter* sp. FB24/71-106  
*Micrococcus luteus* NCTC 2665/72-107  
*Arthrobacter arilaitensis* Re117/53-88  
*Renibacterium salmoninarum* ATCC 33209/71-104  
*Rothia mucilaginosa* DY-18/69-102  
*Kineococcus radiotolerans* SRS30216 = ATCC BAA-14  
*Kribbella flavida* DSM 17836/70-104  
*Microbacterium testaceum* StLB037/53-88  
*Propionibacterium propionicum* F0230a/99-132  
*Tropheryma whipplei* str. Twist/68-101  
*Beutenbergia cavernae* DSM 12333/73-108  
*Jonesia denitrificans* DSM 20603/71-106  
*Isosporicola variabilis* 225/82-117  
*Xylanimonas cellulolytica* DSM 15894/70-106  
*Brachyacterium faecium* DSM 4810/72-108  
*Mobiluncus curtisii* ATCC 43063/69-106  
*Nocardioides* sp. JS614/72-109  
*Bifidobacterium adolescentis* ATCC 15703/69-105

```

EAYTAPGS RFDTRRLWGD PSOKA . . . . DDVSGS GSYT
EAYTAPGS RFDTKRVTWGD PGQKG . . . . DDVSGS GAYT
EAYTAPGS RFDTRRIWGD PSOKA . . . . DDVSGS GAYT
EAYVAPES RFSTKRVTWGD PGQKS . . . . DDVSGS GAYT
EAYVAPES RFNLRVRWGD PSOKS . . . . DDVSGS GAYT
EAYVAPES RFETKRVTWGT RDQKD . . . . DDVSGS GAYT
EAYMAPGS RLHKRVRWGE PHQKS . . . . DDVSGS GAYL
EAYMAPES RFNKRVRWGT PDQKR . . . . DDVSGS GAYL
EAYTAPES RFNQNRVRWGE PEQKS . . . . DDVSGS GAYL
EAYMAPES RFNKRVRWGE AHQKR . . . . DDVSGS GAYL
EAYMAPES RLFKDRIRWGG PEQKR . . . . DDVAGGYYL
EAYLAPES RFSTKREFWGE PGQRS . . . . DDVSGS GAYT
EAYVAPES RLLKQVRWGE PHQKS . . . . DDVSGS GAYT
EAYMAPES RFHKKQVWGE PSQKR . . . . DDVSGGGLIN
EAYVAPES RHQKQVWGE PHQKR . . . . DDVSGGYYT
EAYVAPES RYNAKQVWGO PHQKS . . . . DDVSGGGLYG
EAYVAPES RSNTKRIRWGO PHQKR . . . . DDVSGS GAYT
EAYMAPES RFNKRVRWGD PGOKA . . . . DDVSGS GAYT
EAYLAPGS RFHKKQVWGE AKQRYGGE . G DDVSGA GAYT
EAYVAPES RFHKKQVWGN TGQRSFGE . G DDVSGG GAYT
EAYLAPES RHHKRQVWGE RSQRDAGEGG . DDVSGG GAYT
EAYVAPES RFHKKRVWGR . SSGSDSABEGGK . DDVSGG GAYL
EAYVAPES RRNRQVWGP . GGQRADGEGSK . DDVSGG GAYT
EAYVAPES RFLKQVFWAP . GGQRDPDGEKK . DDVSGG GAYT
EAYLAPGS RMRVQVFW . . . . GISRDDAEGGK . DDVSGG GAYT
EAYLAPGS RFDRRVSLAT . AGP . . . . . GDDVSGG GAYT
EAYLAPGS RHEKRRLTGG . QTV . . . . . SDDVSGG GAYT
EAYVAPES GTARQDRSRVWGE . ESQRK . . . . DDVSGG GAYT
EAYVAPES GQRTDKEKRWGE . PHQRK . . . . DDVSGG GAYT
EAYVAPES GTARDDKTRVWGD . ESQKG . . . . DDVSGG GLYN
EAYLAPES GTAHNDRTRVWGD . GSGK . . . . . DDVAGG GAYT
EAYLAPES GTHRTDRSRVWGD . GSR . . . . . DDVSGG GAYT
EAYLAPES GTARQDKTRVWGD . GSRG . . . . DDVSGA GAYT
EAYVAPES GTHRSERKRVWGD . NSGR . . . . DDVSGG GAYT
EAYVAPES GTHRSKTRVWGS . PEQQS . . . . DDVSGS GAYT
EAYLAPES GTHRTKRVWGD . GTG . . . . . DDVSGK GAYT
EAYLAPES GTNRKRVWGF . . . . ASGGP . . . DDVSGG GAYT
EAYVAPES GTARQDRSRVWGE . RDQV . . . . DDVAGG GAYT
EAYLAPES GTSRFQTRVWGE . QSORE . . . . DDVSGR GAYT
EAYVAPES GTSRHDRTRVWGE . ASQRR . . . . DDVSGG GAYT
EAYVAPES GTSRFQTRVWGE . QDGR . . . . DDVSGR GAYT
EAYVAPES GTSRHDRTRVWGE . QDQQLAG . . . DDVSGR GAYT
EAYVAPES GTSRFQTRVWGT . LEQQK . . . . AGDDVSGR GAYT
EAYLAPES GTGRGERRRVWGD . DAABEG . . . . GDDVAGG GAYT
EAYVAPES ETARQDPTRVWDTHRR . NNP . . . . DDVSGG GAYT

```

**b**

*Myxococcus xanthus* DK 1622/66-85  
*Syntrophomonas wolfei* subsp. *wolfei* str. Goettin  
*Syntrophothermus lipocalidus* DSM 12680/67-88  
*Desulfotomaculum ruminis* DSM 2154/70-91  
*Syntrophobolus glycolicus* DSM 8271/65-86  
*Ruminiclostridium thermocellum* ATCC 27405/68-89  
*Clostridium stercorarium* subsp. *stercorarium* DSM  
*Alkaliphilus metalliredigens* QYMF/66-87  
*Thermaerobacter marianensis* DSM 12885/67-88  
*Clostridium saccharolyticum* WMI/66-88  
*Halobacteroides halobius* DSM 5150/67-86  
*Faecalibacterium prausnitzii* L2-6/77-97  
*Oscillibacter valeriacigenes* Sjm18-20/66-88  
*Clostridium acidurici* 9a/68-89  
*Anaerococcus prevotii* DSM 20548/68-88  
*Acidaminococcus fermentans* DSM 20731/67-88  
*Eubacterium limosum* KIST612/42-63  
*Syntrophobacter fumaroxidans* MPOB/67-95  
*Geobacter uraniireducens* Rf4/69-93  
*Geobacter hemidjiensis* Bem/69-93  
*Geobacter* sp. M18/69-93  
*Desulfomonile tiedjei* DSM 6799/69-91  
*Desulfurispirillum indicum* S5/66-88  
*Desulfurivibrio alkaliphilus* AHT2/78-100  
*Desulfotalea psychrophila* LSV54/91-112  
*Desulfobulbus propionicus* DSM 2032/68-88  
*Desulfarculus baarsii* DSM 2075/68-90  
*Candidatus Nitrospira defluvi*/68-90  
*Thermodesulfobacterium yellowstonii* DSM 11347/69-94  
*Syntrophus aciditrophicus* SB/69-91  
*Deferribacter desulfuricans* SSM1/68-113  
*Denitrovibrio acetiphilus* DSM 12809/70-92  
*Paenibacillus* sp. JDR-2/71-92  
*Treponema pallidum* subsp. *pallidum* str. *Nichols*/  
*Spirochaeta smaragdinae* DSM 11293/66-88  
*Sphaerochaeta globosa* str. *Buddy*/78-101  
*Sphaerochaeta coccoides* DSM 17374/67-89  
*Treponema succinifaciens* DSM 2489/82-105  
*Lawsonia intracellularis* PHE/MN1-00/67-87  
*Desulfobalobium retbaense* DSM 5692/67-89  
*Desulfobacterium africanus* str. *Walvis Bay*/67-87  
*Desulfococcus oleovorans* Hxd3/73-94  
*Borrelia turicatae* 91E135/70-92  
*Thermus aquaticus*/70-93

```

EAYVAGPKGREDR . . . . . SEKV . . . . . SH
EAYVAP.RSRLDK . . . . . EARI . . . . . DN . . . . LY
EAYVAP.RHRFDR . . . . . TPKV . . . . . DA . . . . LY
EAYVAR.RTMADK . . . . . VPKM . . . . . DQ . . . . PY
EAYVAP.GKLTEK . . . . . NAGR . . . . . DK . . . . NY
EAYTAK.GSRFDK . . . . . QGGW . . . . . SD . . . . PG
EAYTAA.RTRFRD . . . . . EAGI . . . . . SE . . . . QG
EAYTAA.RGMTDK . . . . . DPKV . . . . . DK . . . . QG
EAYLAR.RTRHRD . . . . . EPKV . . . . . DQ . . . . SY
EAYVTS.GSRFDR . . . . . ETAG . . . . . GE . . . . YY
EAYVTE.D.YQ . . . . . KQPR . . . . . N . . . . LN
EAYVAT.RTRFDK . . . . . VNK . . . . . I . . . . NN
EAYVAPGRTRFQK . . . . . QHEF . . . . . AE . . . . SR
EAYVTK.GNYMEK . . . . . DKSK . . . . . E . . . . QY
EAYVSE.N.DH . . . . . TIKE . . . . . AS . . . . RY
EAYITS.GSHLDK . . . . . SLE . . . . . TR . . . . LY
EAYVSP.RRLDQK . . . . . EGN . . . . . TN . . . . PY
EAYLAP.RSRHRH . . . . . GRAEGSG . . . . TG . . . . EED . RNY
EAYIAP.GSRFSK . . . . . ESGN . . . . . GH . . . . EST . SSY
EAYIAP.QDRFLK . . . . . QAPS . . . . . SP . . . . GQA . SSY
EAYIAP.HSRTLK . . . . . QAPT . . . . . AA . . . . DPV . TSY
EAYIAP.ESRFDH . . . . . NAKA . . . . . GQ . . . . VA . YY
EAYVSP.GSREK . . . . . NAEG . . . . . VY . . . . EG . . . . AY
EAYVAP.ADRRDK . . . . . SAKS . . . . . AG . . . . AA . . . . AH
EAYIAP.GDMREQ . . . . . K . . . . . KI . . . . . NG . . . . QT . . . . AY
EAYLAE.NGMEIH . . . . . D . . . . . RS . . . . . AG . . . . HN . . . . F
EAYVAP.GDRRDK . . . . . EHRP . . . . . GH . . . . ET . . . . AF
EAYMAP.GSRLEK . . . . . NSHL . . . . . AH . . . . ND . . . . YY
EAYVAP.QSRFDK . . . . . INKDPGM . . . . PE . . . . EA . . . . SF
EAYVAP.KTRFEK . . . . . TGGG . . . . . IG . . . . DT . . . . AR
EAYVAP.DSRFNK . . . . . NYSK . . . . . KE . . . . DK . . . . SY
EAYVAP.DSRFNT . . . . . TYER . . . . . GO . . . . ER . . . . NH
EAYFTA.GSRFEK . . . . . GTRK . . . . . D . . . . NP . . . . IY
EAYVAP.ESRFDK . . . . . SEHT . . . . . IG . . . . RR . . . . YY
EAYVAP.GSRHVK . . . . . NGSE . . . . . KG . . . . NR . . . . YQ
EAYCNP.AGHTER . . . . . PAPG . . . . . GRKN . . . . QY
EAYVAP.ESHTEK . . . . . EGVE . . . . . G . . . . KPR . . . . AY
EAYVAV.GSHTER . . . . . NDVP . . . . . FGRS . . . . YF
EAYVTK.DHADK . . . . . LSK . . . . . FS . . . . KA . . . . RH
EAYVAP.GDRRTK . . . . . HTDK . . . . . DI . . . . RS . . . . GY
EAYVAG.EGGVE . . . . . KGP . . . . . G . . . . AK . . . . RH
EAYVAP.RSITDR . . . . . TPMDH . . . . . DG . . . . LS . . . . .
EAYMSS.TSKHIK . . . . . KNDE . . . . . LG . . . . RP . . . . YF
EAYVAA.ESRFDK . . . . . KRKGG . . . . . LD . . . . GG . . . . YF

```

**c** *Escherichia coli*/69-83

```

DFNVQC.DLLGDE . . . . . LTH

```

**Supplementary Figure 3 | Sequence conservation of the long loop in the PHP-exonuclease.** Alignment of the long loop in the PHP-exonuclease, equivalent to glutamate 73 to histidine 107 from Mtb DnaE1 (see Sup. Fig. 2). Blue arrows on top indicate the  $\beta$ -strands flanking the loop. (a) 45 sequences from Actinobacteria (b) 45 sequences from  $\delta$ -proteobacteria and Firmicutes (c) The equivalent sequence from *E. coli* PolIII $\alpha$ , which is an inactive PHP-exonuclease.

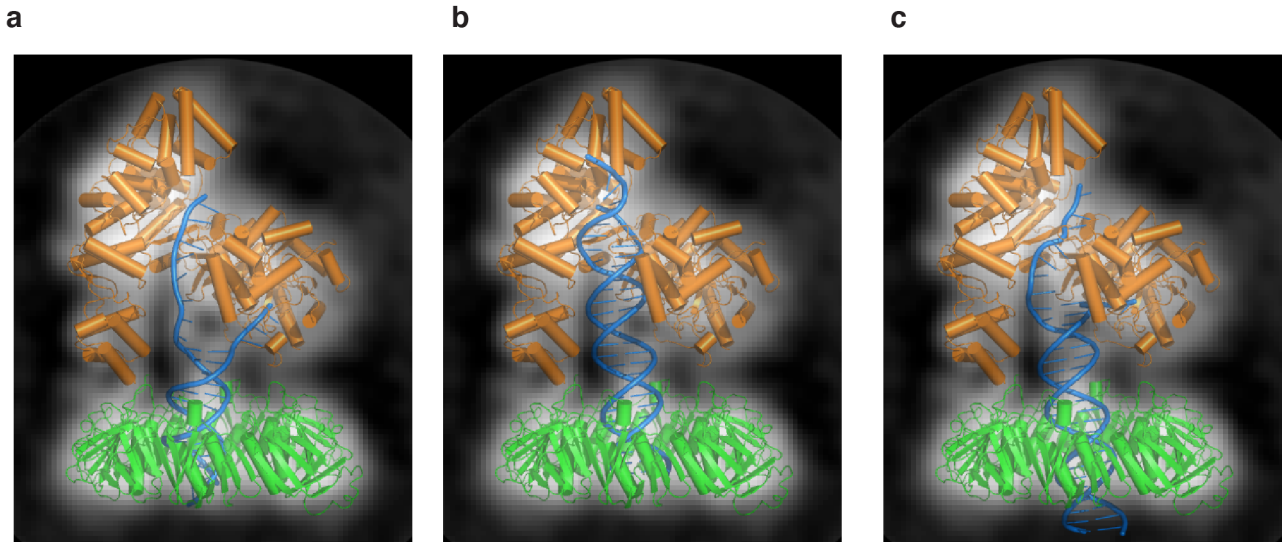

**Supplementary Figure 4 | Modeling of the DNA into the 2D cryo-EM class.** Different DNA models were fitted into the 2D cryo-EM class. **(a)** Model with the primer strand entering the PHP-exonuclease between short  $\beta$ -hairpin and long loop in the PHP domain (see Fig. 3). **(b)** DNA modeled in the polymerase mode (see Supplementary Fig. 1) **(c)** Model with the primer strand entering the PHP-exonuclease via the narrow groove between polymerase active site and exonuclease active site (see Fig. 2d).



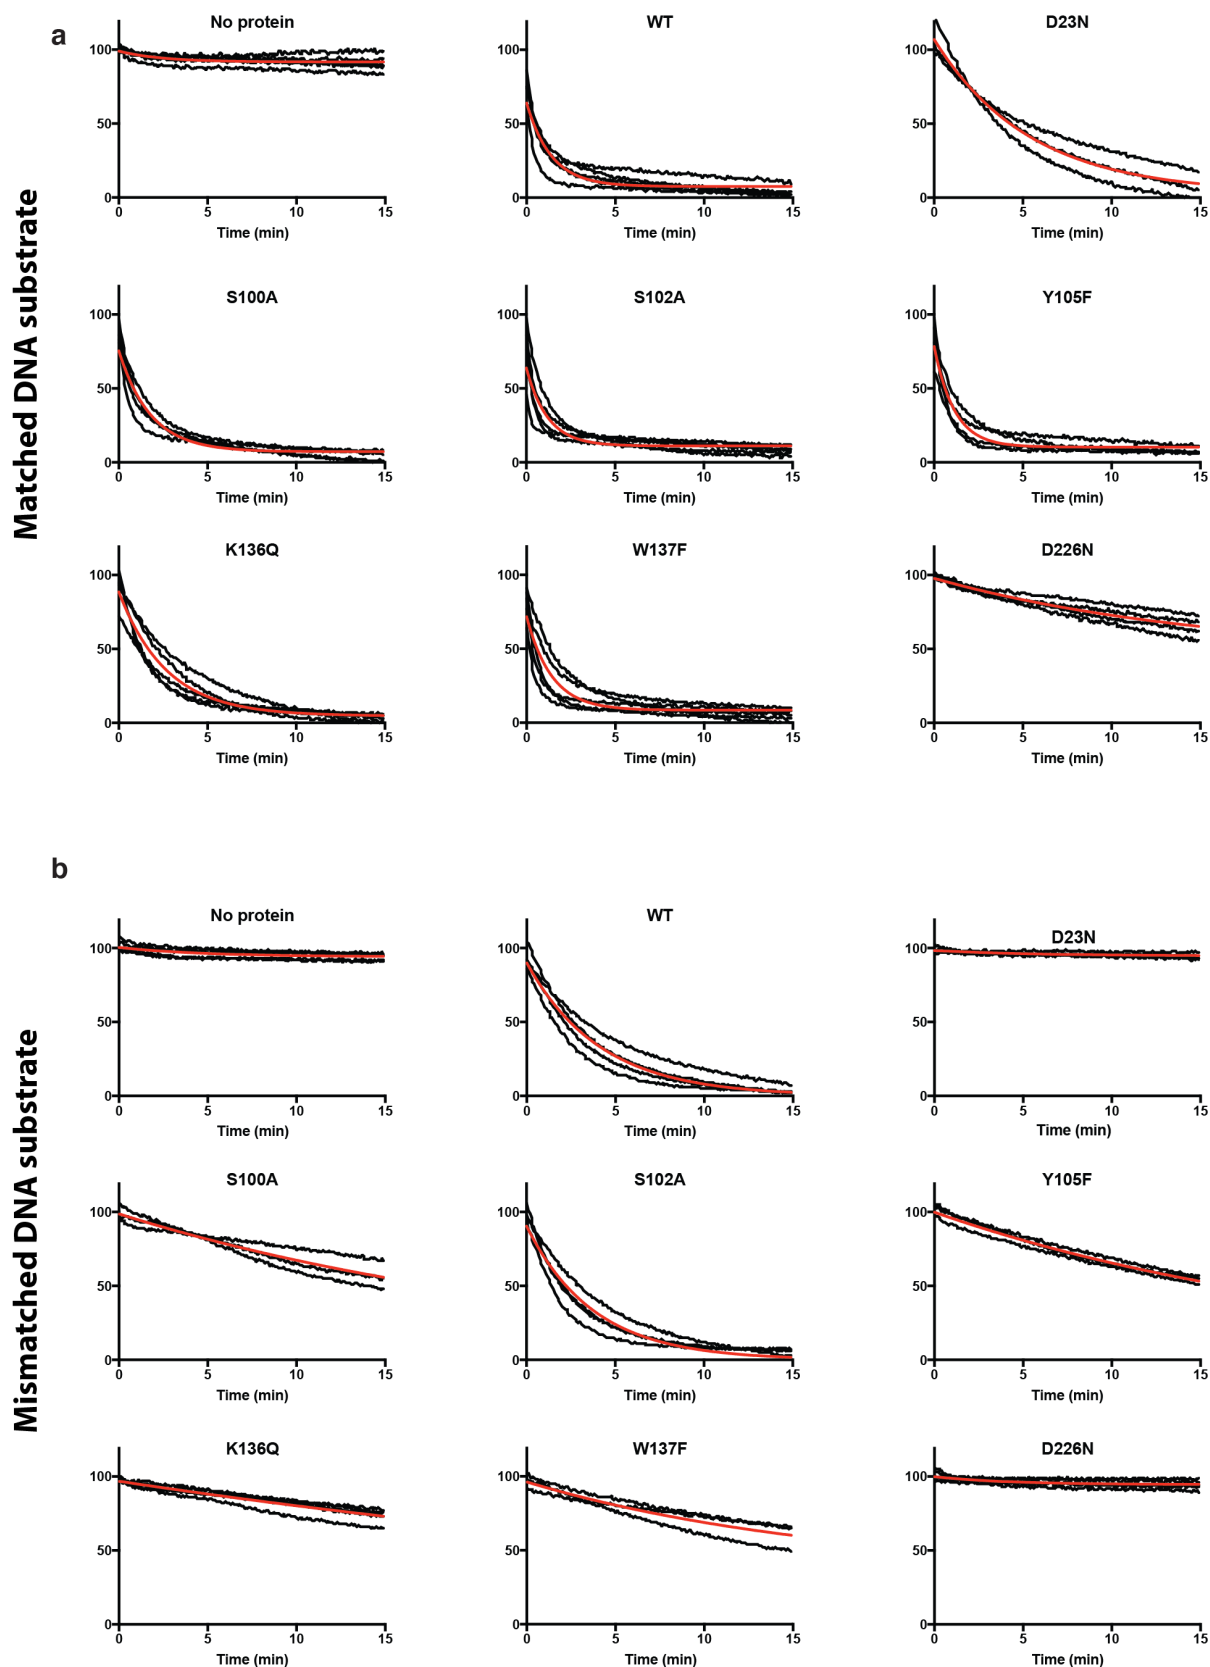

**Supplementary Figure 5 | Real time polymerase assays on matched and mismatched DNA.** Real-time primer extension assay in which the intensity of a 5' placed fluorophore is quenched by the incorporation of nucleotides in the bottom strand. **(a)** Primer extensions on a matched DNA substrate **(b)** Primer extension on mismatched DNA substrate. A single exponential decay was fitted to three to five independently measured experiments. Experimental curves in black, fitted curve in red.

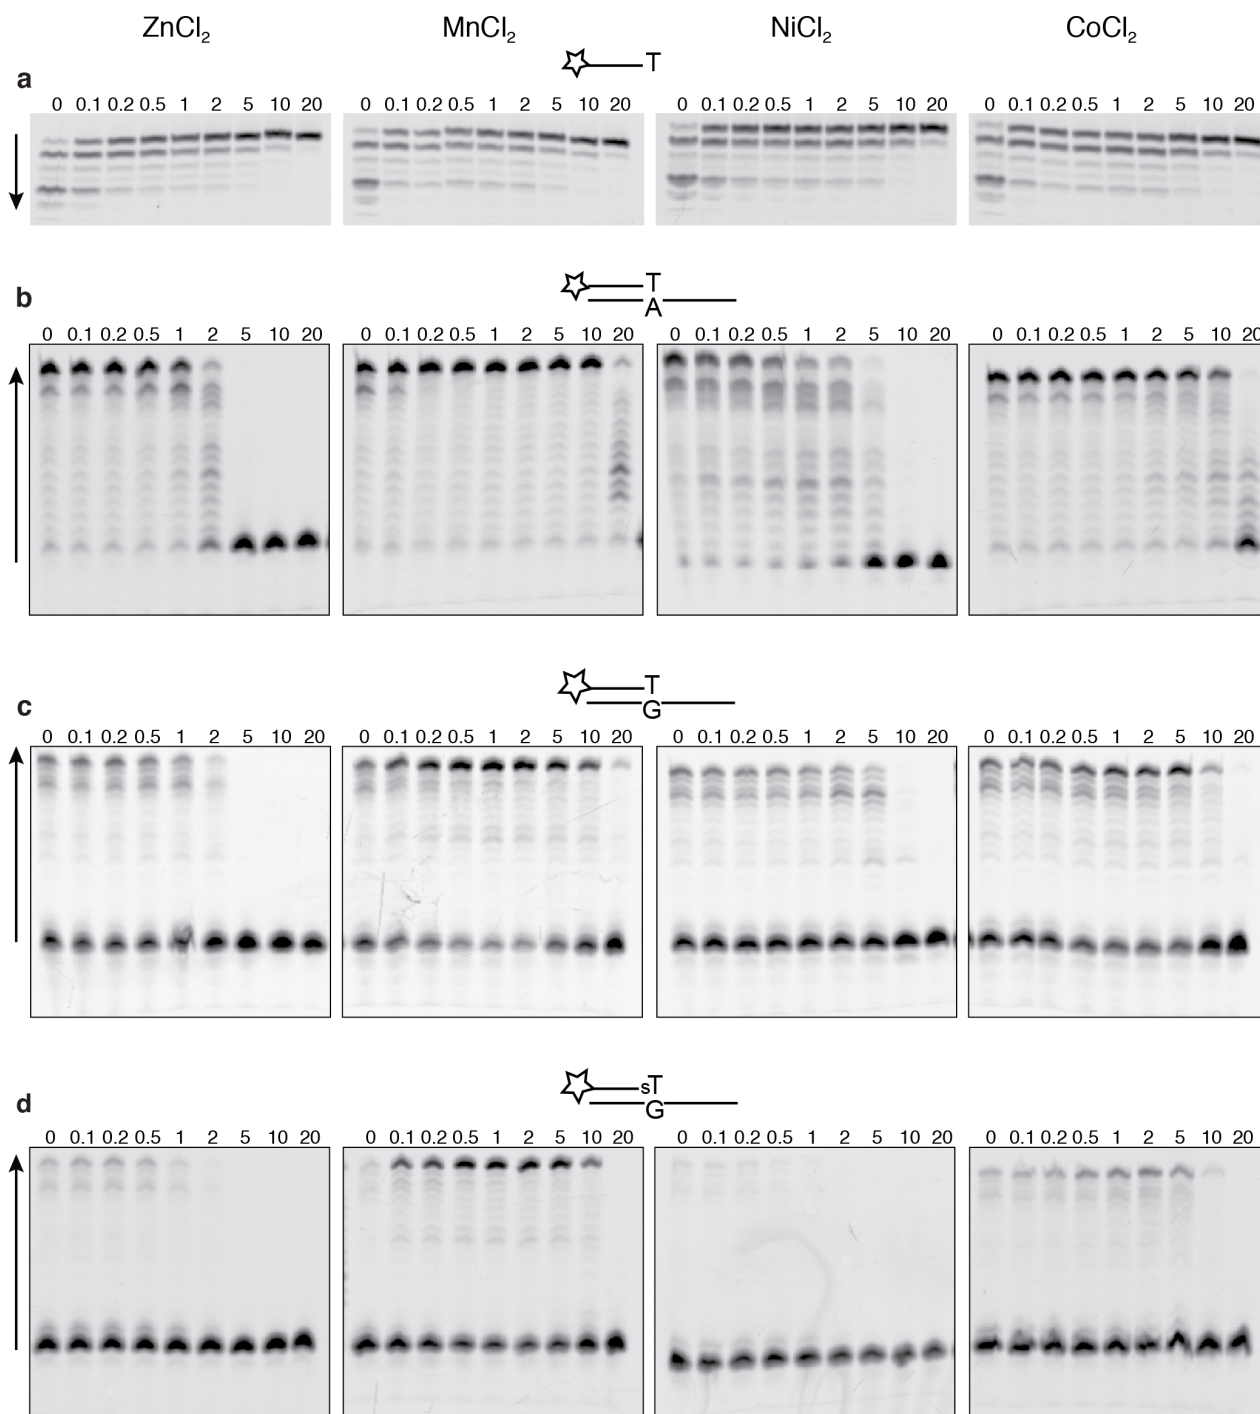

**Supplementary Figure 6 | Exonuclease and polymerase inhibition by diverse metals.** Different metals inhibit the PHP-exonuclease and polymerase at mM concentrations (a) Exonuclease activity on a single stranded DNA substrate (b) Polymerase activity on a matched substrate (c) Polymerase activity on a mismatched DNA substrate (d) Polymerase activity on a non-cleavable mismatched DNA substrate. Note that  $\text{MnCl}_2$  enables the polymerase to extend from a mismatch, but inhibits the exonuclease. All reactions contained 2 mM Mg and increasing amounts of the indicated metal (0-20 mM). See main Fig. 4e-f for more details. Uncropped gels are shown in Supplementary Fig. 8.

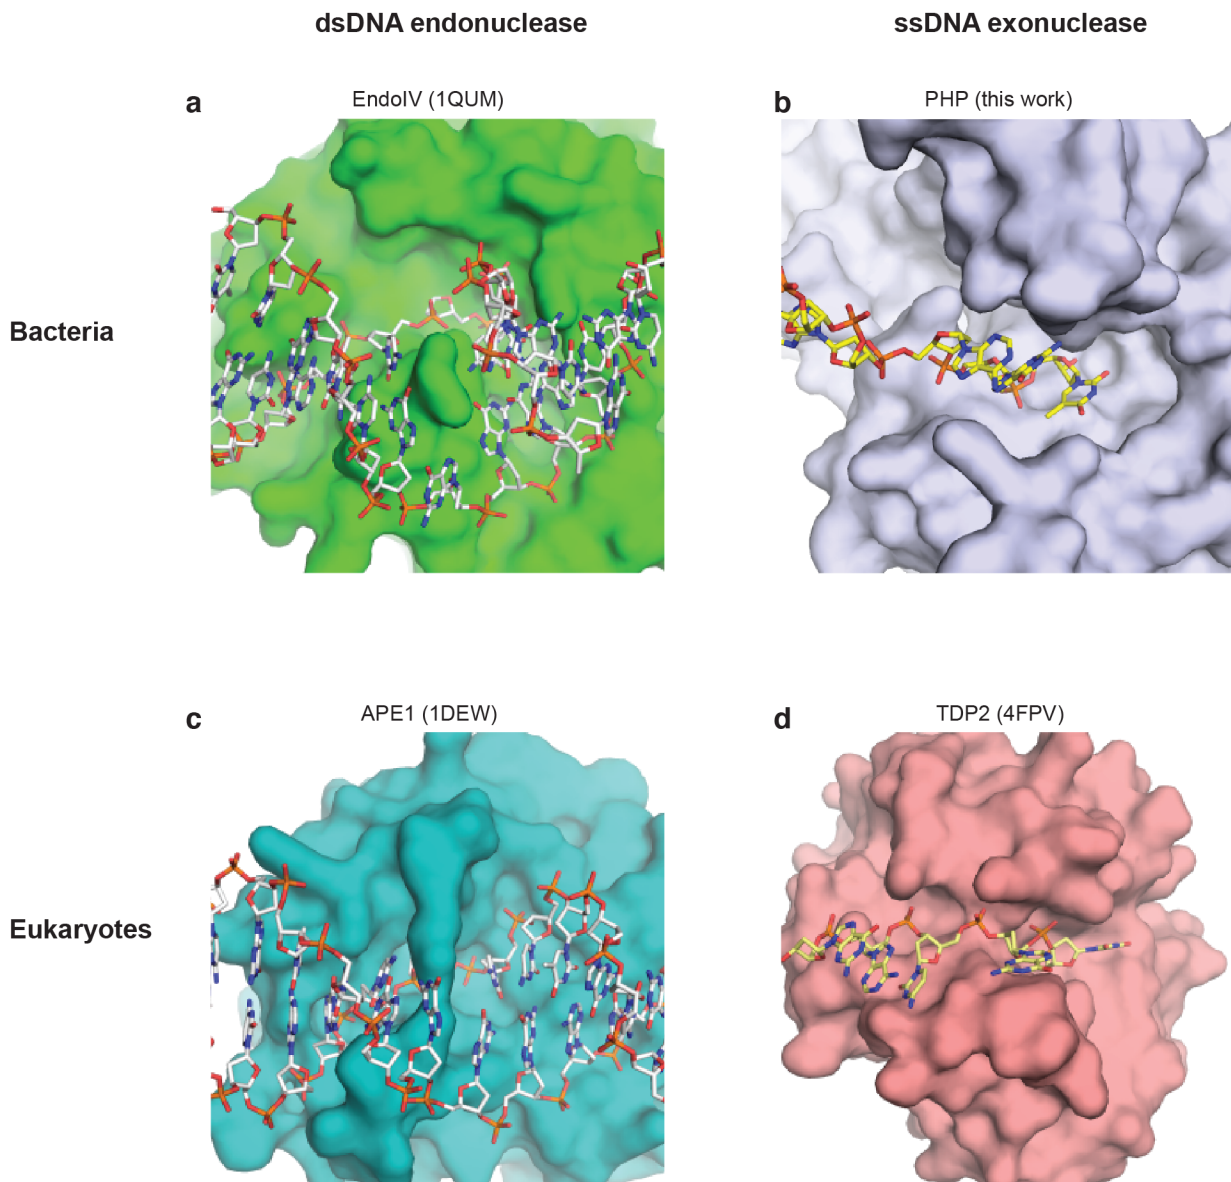

**Supplementary Figure 7 | DNA binding in the endonuclease/exonuclease pairs EndoIV/PHP and APE1/TDP2** (a) dsDNA with an abasic site bound by *E. coli* Endo IV<sup>11</sup> (b) Modeling of ssDNA binding in PHP domain of Mtb DnaE1 (c) dsDNA with an abasic site bound by human APE1<sup>12</sup> (d) ssDNA binding in the zebrafish TDP2<sup>13</sup>.

## Supplementary References

1. Evans, R. J. *et al.* Structure of PolC reveals unique DNA binding and fidelity determinants. *Proc. Natl. Acad. Sci. USA* **105**, 20695–20700 (2008).
2. Fernandez-Leiro, R., Conrad, J., Scheres, S. H. & Lamers, M. H. cryo-EM structures of the E. coli replicative DNA polymerase reveal its dynamic interactions with the DNA sliding clamp, exonuclease and  $\tau$ . *Elife* **4**, 459 (2015).
3. Bailey, S., Wing, R. A. & Steitz, T. A. The structure of T. aquaticus DNA polymerase III is distinct from eukaryotic replicative DNA polymerases. *Cell* **126**, 893–904 (2006).
4. Leulliot, N. *et al.* The family X DNA polymerase from Deinococcus radiodurans adopts a non-standard extended conformation. *J. Biol. Chem.* **284**, 11992–11999 (2009).
5. Lamers, M. H., Georgescu, R. E., Lee, S.-G., O'Donnell, M. & Kuriyan, J. Crystal structure of the catalytic alpha subunit of E. coli replicative DNA polymerase III. *Cell* **126**, 881–892 (2006).
6. Devos, J. M., Tomanicek, S. J., Jones, C. E., Nossal, N. G. & Mueser, T. C. Crystal structure of bacteriophage T4 5' nuclease in complex with a branched DNA reveals how flap endonuclease-1 family nucleases bind their substrates. *J. Biol. Chem.* **282**, 31713–31724 (2007).
7. Davies, D. R., Interthal, H., Champoux, J. J. & Hol, W. G. J. Explorations of peptide and oligonucleotide binding sites of tyrosyl-DNA phosphodiesterase using vanadate complexes. *J. Med. Chem.* **47**, 829–837 (2004).
8. Changela, A., DiGate, R. J. & Mondragón, A. Crystal structure of a complex of a type IA DNA topoisomerase with a single-stranded DNA molecule. *Nature* **411**, 1077–1081 (2001).
9. Lorentzen, E., Basquin, J., Tomecki, R., Dziembowski, A. & Conti, E. Structure of the active subunit of the yeast exosome core, Rrp44: diverse modes of substrate recruitment in the RNase II nuclease family. *Mol. Cell* **29**, 717–728 (2008).
10. Katoh, K. & Standley, D. M. MAFFT multiple sequence alignment software version 7: improvements in performance and usability. *Mol. Biol. Evol.* **30**, 772–780 (2013).
11. Hosfield, D. J., Guan, Y., Haas, B. J., Cunningham, R. P. & Tainer, J. A. Structure of the DNA repair enzyme endonuclease IV and its DNA complex: double-nucleotide flipping at abasic sites and three-metal-ion catalysis. *Cell* **98**, 397–408 (1999).
12. Mol, C. D., Izumi, T., Mitra, S. & Tainer, J. A. DNA-bound structures and mutants reveal abasic DNA binding by APE1 and DNA repair coordination [corrected]. *Nature* **403**, 451–456 (2000).
13. Shi, K. *et al.* Structural basis for recognition of 5'-phosphotyrosine adducts by Tdp2. *Nat. Struct. Mol. Biol.* **19**, 1372–1377 (2012).

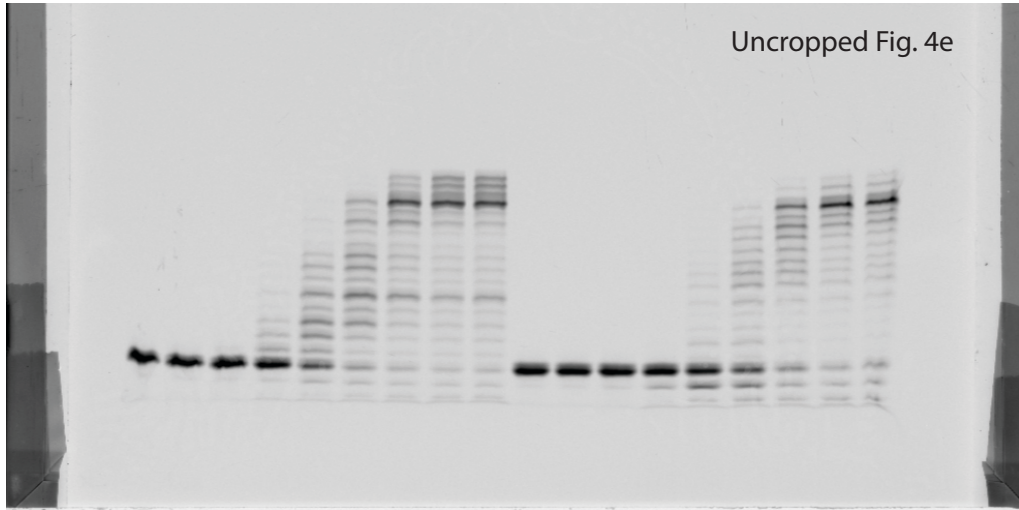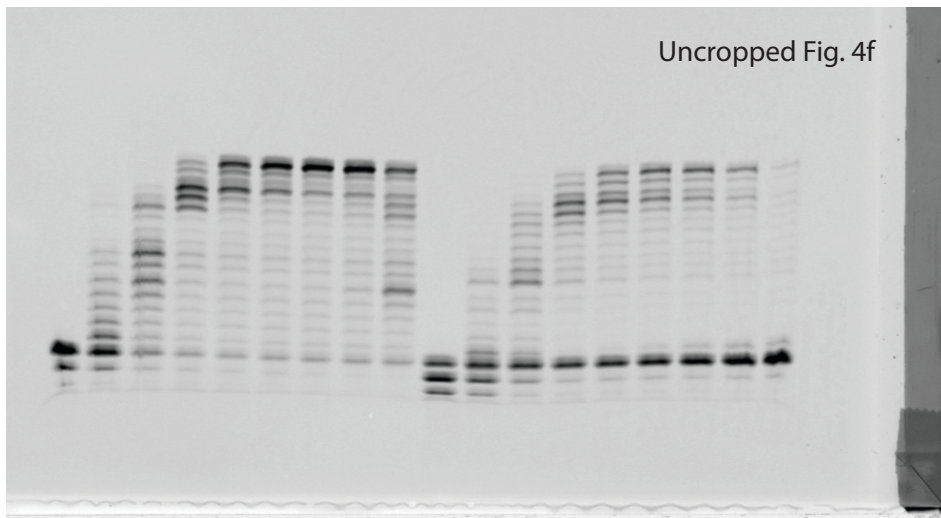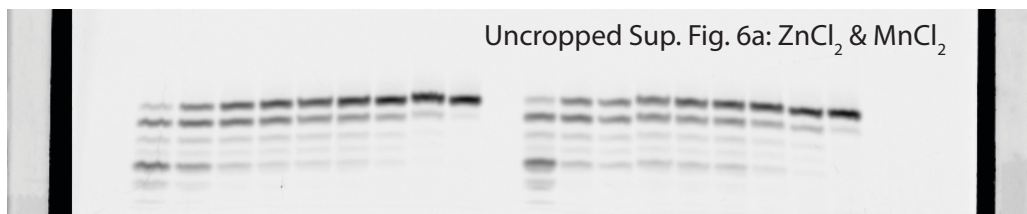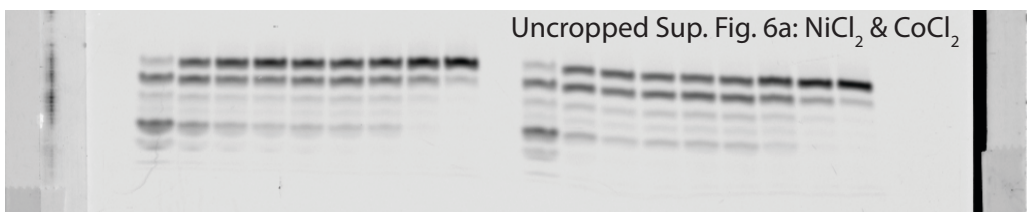

Supplementary Figure 8 | Uncropped gels for Figures 3e-f and Supplementary Figure 6a



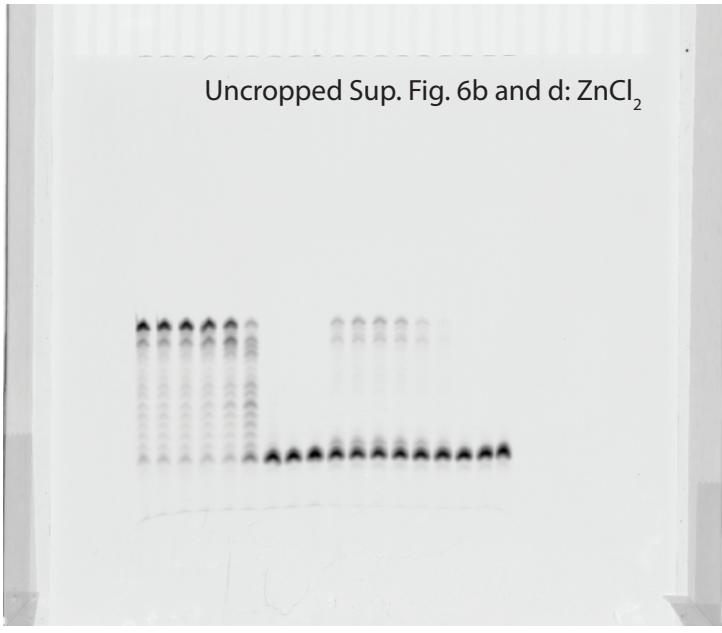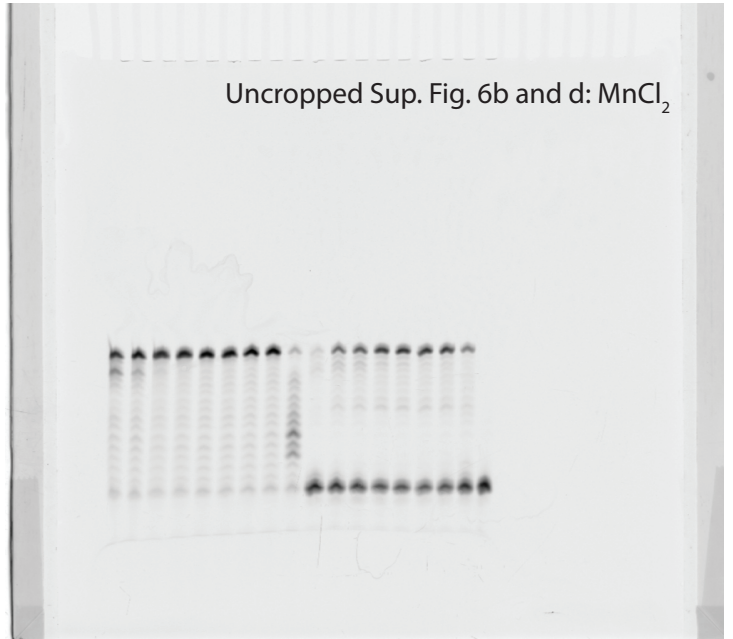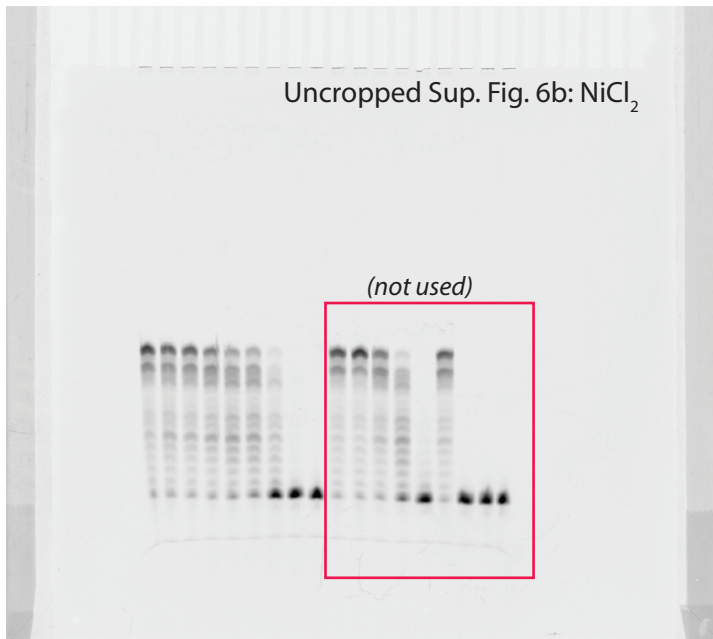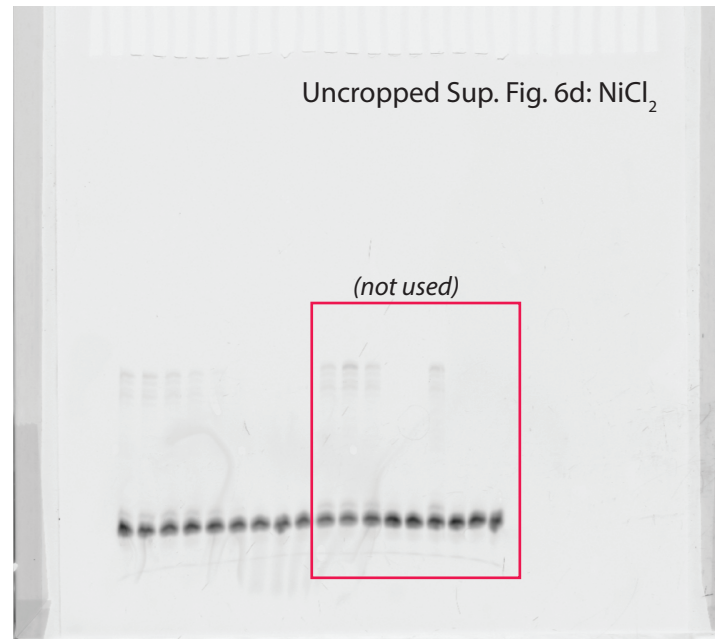

Supplementary Figure 8 (continued) | Uncropped gels for Supplementary Figure 6b and 6d

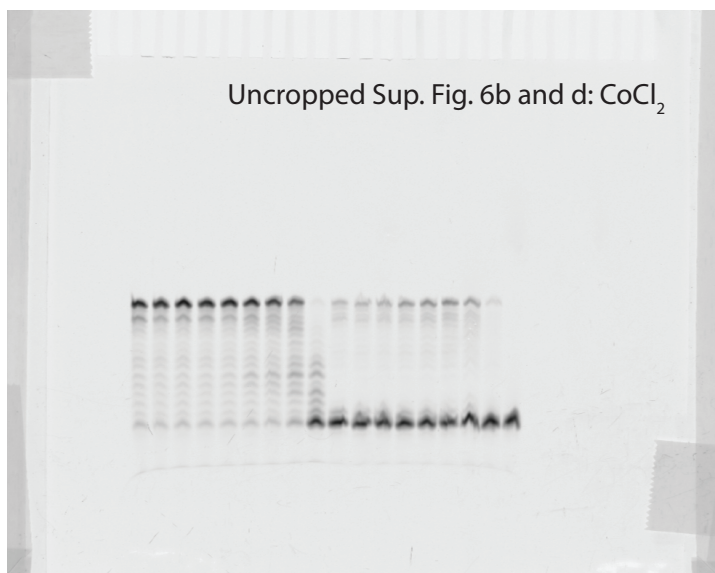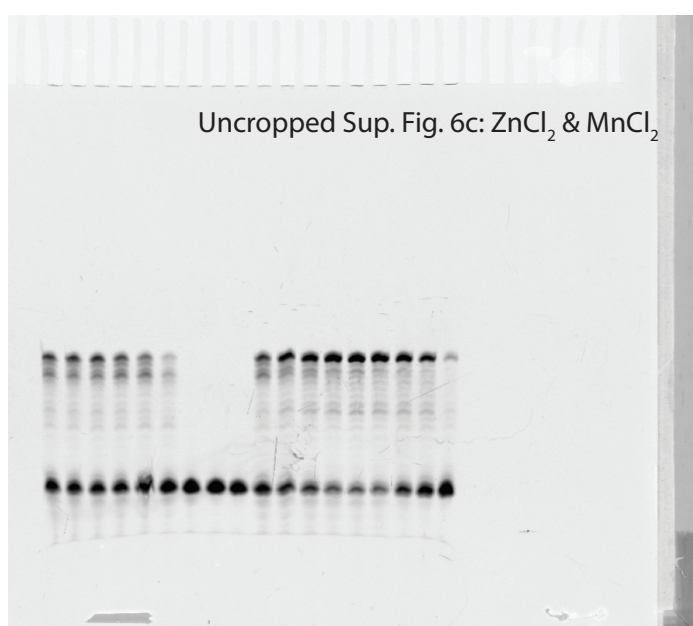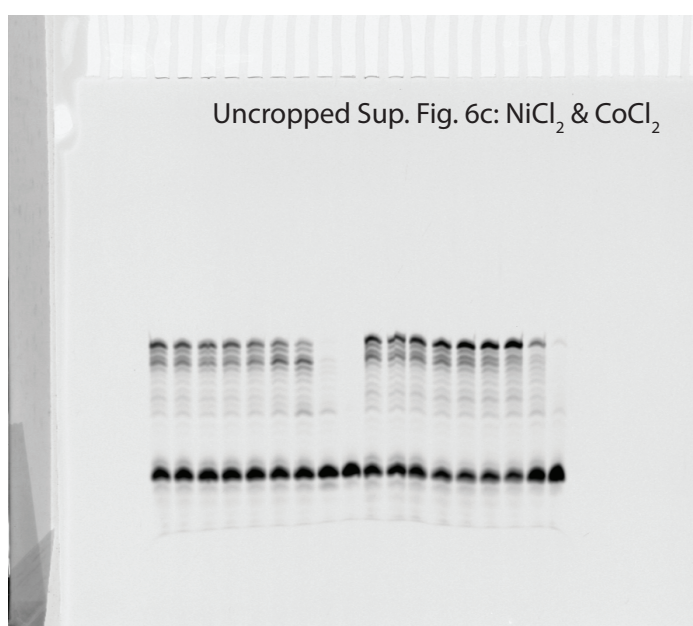

Supplement: 41467_2017_886_MOESM1_ESM.pdf [file 41467_2017_886_MOESM1_ESM.pdf]
